# Supplementary material
Source: Elsevier journal article supplement (https://www.sciencedirect.com/science/article/pii/S0021755722001334)
Supplement: mmc1 [file S0021755722001334:mmc1.docx]

**JPED-D-22-00224 - Supplementary material**

**Appendix 1 - Monitoring parameters and reference values of multi-channel intraluminal impedance associated with pHmetry (MIIpH) for children up to ten years of age, according to Mousa et al. (2014).8**

| **Variable** |  | **< 1 year** | **1-17 years** |
| --- | --- | --- | --- |
| **MII normality parameters** |  |  |  |
| Gastroesophageal reflux frequency | Overall | < 93 | < 71 |
|  | Orthostatic | < 68 | < 69 |
|  | Supine | < 61 | < 19 |
| All reflux percent time | Overall | < 2.9% | < 2.4% |
| Orthostatic | < 5.1% | < 4.4% |
| Supine | < 2.8% | < 1% |
| BCT | Overall | < 20 | < 32 |
| Orthostatic | < 19 | < 36 |
| Supine | < 31 | < 42 |
| Percentage AGER | Overall | < 1.4% | < 1.3% |
| Orthostatic | < 2.2% | < 2.7% |
| Supine | < 1.3% | < 0.7% |
| Frequency AGER | Overall | < 24 | < 55 |
|  | Orthostatic | < 33 | < 52 |
|  | Supine | < 24 | < 15 |
| N episodes: AGER: proximal channels | Overall | < 44 | < 43 |
| Orthostatic | < 40 | < 39 |
|  | Supine | < 21 | < 11 |
| Percentage NAGER | Overall | < 2.5% | < 1.0% |
| Orthostatic | < 3.4% | < 1.9% |
| Supine | < 2.2% | < 0.5% |
| Frequency NAGER | Overall | < 67 | < 34 |
|  | Orthostatic | < 46 | < 25 |
|  | Supine | < 48 | < 9 |
| N episodes: NAGER: proximal channels | Overall | < 57 | < 20 |
| Orthostatic | < 46 | < 17 |
| Supine | < 40 | < 7 |
| **Normality parameters of pHmetry** | | | |
| Boix-Ochoa Score | | < 16.6 |  |
| Johnson/DeMeester Score | |  | < 22.0 |
| Association gastroesophageal reflux episodes with symptoms | SI ≥ 50%; SSI ≥ 10%; SAP > 95% | | |
| Monitoring time | Minimum of 20 hours | | |

AGER, acid gastroesophageal reflux; BCT, Bolus contact time MII, multi-channel intraluminal impedance; N, number; NAGER, non-acid gastroesophageal reflux; SI, symptom index; SSI, symptom sensitivity index; SAP, symptom association probability.

**Appendix 2 - Description of respiratory and digestive symptoms correlated with GER episodes in patients with cystic fibrosis classified as having physiological GER and GERD.**

| **Symptoms** | **Physiological GER** | | **GERD** | **Total** | **p** |
| --- | --- | --- | --- | --- | --- |
| **Respiratory (present)** |  |  | |  |  |
| Correlated with reflux | 126 | 57 | | 183 | 0.165a |
| No correlated with reflux | 160 | 53 | | 213 |
| Total number of events | 286 | 110 | | 396 |  |
| **Digestive (present)** |  |  | |  |  |
| Correlated with reflux | 19 | 14 | | 33 | 0.313b |
| No Correlated with reflux | 13 | 4 | | 17 |
| Total number of events | 32 | 28 | | 50 |  |
| **GERD** | **Respiratory** | **Digestive** | | **Total** | **p** |
| Correlated with reflux | 57 | 14 | | 71 | 0.067b |
| No correlated with reflux | 53 | 4 | | 57 |
| Total number of events | 110 | 28 | | 138 |  |

GER, gastroesophageal reflux; GERD, gastroesophageal reflux disease.

a We performed the statistical analysis using the chi-square test.

b We performed the statistical analysis using the Fisher’s exact test.

We adopted an alpha of 0.05.

**Appendix 3 - Association of pHmetry and multi-channel intraluminal impedance (MII) meters with GERD and physiological GER identification in patients with cystic fibrosis.**

| **Marker (pHmetry)** | **All participants** | **GERD** | **Physiological GER** | **p** |
| --- | --- | --- | --- | --- |
| Total number of GER episodes in pHmetry | 27.21 ± 14.26; 25 (17.50 to 37) | 39.30 ± 13.28; 38 (27.50 to 51.50) | 20.84 ± 10.21; 20 (12 to 30) | **0.002** |
| Total number of episodes in minutes |  |  |  |  |
| Orthostatics | 18.55 ± 11.43; 16 (11 to 26) | 26.40 ± 12.89; 23.50 (18.75 to 32) | 14.42 ± 8.24; 13 (9 to 18) | **0.016** |
| Supine | 8.66 ± 9.05; 6 (4 to 11) | 12.90 ± 10.80; 9 (5.75 to 17) | 6.42 ± 7.34; 5 (1 to 8) | 0.064 |
| Total (%) pH time (Vandenplas) |  |  |  |  |
| Overall | 3.74 ± 3.80; 2.80 (0.95 to 4.50) | 7.23 ± 4.56; 6.55 (3.60 to 11.30) | 1.90 ± 1.32; 1.50 (0.80 to 2.90) | **0.002** |
| Orthostatic | 4.96 ± 5.24; 2.70 (1.70 to 7.55) | 9.59 ± 6.46; 9 (3.35 to 13.65) | 2.52 ± 1.91; 2 (0.90 to 3.50) | **0.021** |
| Supine | 2.93 ± 4.40; 1.10 (0.50 to 3.80) | 5.87 ± 6.32; 3.65 (1.23 to 9.15) | 1.38 ± 1.70; 0.80 (0.10 to 1.60) | **0.021** |
| Mean acid clearance time (sec) |  |  |  |  |
| Overall | 100.45 ± 84.97; 68 (47.50 to 127) | 158.60 ± 117.17; 121 (61.50 to 245) | 69.84 ± 38.73; 60 (44 to 88) | 0.128 |
| Orthostatic | 79.79 ± 65.71; 60 (39 to 101) | 121 ± 93.75; 102 (45.25 to 163.50) | 58.11 ± 29.70; 46 (36 to 76) | 0.270 |
| Supine | 176.03 ± 343.85; 81 (42 to 146) | 353.40 ± 550.46; 98.50 (77.25 to 429.75) | 82.68 ± 75.72; 61 (25 to 117) | 0.128 |
| Number of episodes ≥5 min in duration | 1.97 ± 3.27; 0 (0 to 2.70) | 4.90 ± 4.13; 4.65 (1.50 to 8.38) | 0.43 ± 0.92; 0.29 (0 to 2) | **0.005** |
| Duration of > episode (min) | 11.90 ± 14.58; 3.80 (2.95 to 16) | 22.15 ± 18.64; 15.70 (9.2 to 38.18) | 6.51 ± 8.23; 3.70 (2.40 to 4.40) | **0.002** |
| Final patient score | 18.24 ± 20.66; 12.20 (5.70 to 21.50) | 36.30 ± 26.82; 27 (20.50 to 49.08) | 8.74 ± 5.24; 7 (4.30 to 14.90) | **0.002** |
| **Marker (MII)** | **All participants** | **GERD** | **Physiological GER** | **p** |
| Total number of MII GER | 51.10 ± 26.17; 41 (34 to 63) | 75.30 ± 29.51; 85 (40.75 to 96.50) | 38.37 ± 11.55; 37 (33 to 46) | 0.064 |
| Total number of MII GER – acid |  |  |  |  |
| Overall | 34.90 ± 19.26; 33 (22 to 42.50) | 53 ± 19.40; 52 (33.75 to 75.50) | 25.37 ± 10.54; 25 (18 to 36) | **0.016** |
| Orthostatic | 23.83 ± 15.17; 22 (13.50 to 29) | 35.20 ± 18.34; 27.50 (24.50 to 50) | 17.84 ± 8.96; 16 (11 to 24) | **0.002** |
| Supine | 11.07 ± 12.02; 8 (4 to 15) | 17.80 ± 16.70; 12.50 (8 to 21.25) | 7.53 ± 6.83; 6 (2 to 10) | 0.236 |
| Total number of MII GER – non-acid |  |  |  |  |
| Overall | 16.21 ± 16.53; 13 (6 to 24.50) | 22.30 ± 25.45; 12.50 (5.75 to 30.50) | 13 ± 8.36; 13 (6 to 22) | 0.694 |
| Orthostatic | 9.34 ± 7.81; 7 (4 to 15.50) | 10.10 ± 10.35; 6.50 (2 to 19) | 8.95 ± 6.38; 7 (1 to 7) | 0.449 |
| Supine | 6.86 ± 11.06; 3 (1 to 9) | 12.20 ± 17.49; 4.50 (0 to 19) | 4.05 ± 3.63; 3 (1 to 7) | 0.714 |
| % time of reflux exposure |  |  |  |  |
| Overall | 2.47 ± 2.74; 1.80 (1.35 to 2.60) | 2.58 ± 0.94; 2.45 (1.78 to 3.28) | 2.42 ± 3.35; 1.60 (1.10 to 2.50) | 0.128 |
| Orthostatic | 4.51 ± 7.78; 2.90 (2.05 to 4.05) | 4.25 ± 2.16; 3.65 (2.50 to 5.90) | 4.65 ± 9.58; 2.60 (1.70 to 3.40) | 0.270 |
| Supine | 1.09 ± 1.02; 0.70 (0.40 to 1.35) | 1.30 ± 1.06; 0.90 (0.48 to 2.30) | 0.97 ± 1.02; 0.70 (0.40 to 1.10) | 1 |
| Bolus contact time (sec) |  |  |  |  |
| Overall | 16.69 ± 4.26; 16 (14 to 19) | 15.20 ± 2.49; 15 (13.75 to 16) | 17.47 ± 4.82; 17 (14 to 21) | **0.044** |
| Orthostatic | 16.86 ± 5.16; 16 (13.50 to 19.50) | 16.40 ± 5.28; 15 (13.75 to 17.50) | 17.11 ± 5.23; 16 (13 to 20) | 0.449 |
| Supine | 17.03 ± 7.30; 15 (12.50 to 20.50) | 14.60 ± 2.84; 14 (12.75 to 15.75) | 18.32 ± 8.59; 16 (11 to 24) | 0.114 |
| Total number of episodes in proximal channels | 33.93 ± 24.24; 23 (18.50 to 43.50) | 52.90 ± 30.98; 54.50 (21 to 76.25) | 23.95 ± 11.34; 22 (18 to 30) | 0.128 |
| Proximal channel/total channel | 60.55 ± 17.70; 66 (46.75 to 70.50) | 63.94 ± 21.49; 70 (44.50 to 82.25) | 58.77 ± 15.71; 61 (47.50 to 67) | 0.450 |
| Total number of episodes in the proximal channels (acid) |  |  |  |  |
| Overall | 22.76 ± 15.07; 20 (11.50 to 31.50) | 35 ± 17.33; 32 (19.75 to 49.75) | 16.32 ± 8.71; 17 (9 to 21) | **0.021** |
| Orthostatic | 14.52 ± 11.18; 12 (5.50 to 19.50) | 22.50 ± 13.52; 20 (13.25 to 28.15) | 10.32 ± 7.01; 9 (5 to 16) | **0.021** |
| Supine | 7.93 ± 9.33; 4 (1.50 to 11.50) | 12.50 ± 12.97; 10.50 (1.75 to 17.75) | 5.53 ± 5.80; 4 (1 to 10) | 0.128 |
| Total number of episodes in the proximal channels (non-acid) |  |  |  |  |
| Overall | 11.17 ± 14.54; 7 (3 to 15) | 17.90 ± 22.54; 10 (2 to 26.50) | 7.64 ± 6.03; 7 (3 to 12) | 1 |
| Orthostatic | 5.59 ± 6.34; 3 (2 to 7.5) | 7.20 ± 9.15; 2.50 (1.75 to 13.75) | 4.74 ± 4.31; 3 (2 to 7) | 1 |
| Supine | 5.59 ± 9.55; 3 (0 to 6) | 10.70 ± 14.96; 4.50 (0 to 17.25) | 2.89 ± 2.77; 2 (0 to 5) | 0.694 |

GERD, gastroesophageal reflux disease; GER, gastroesophageal reflux; sec, second.

We presented the data in absolute frequency and relative frequency or mean ± standard deviation; median (25th to 75th percentile).

We performed the statistical analysis using the Mann-Whitney test.

We adopted an alpha of 0.05.

**Appendix 4 - Association of multi-channel intraluminal impedance associated with pHmetry (MIIpH) with demographic, clinical, and laboratory markers in patients with cystic fibrosis.**

| **Marker** | **GERD** | **Physiological GER** | **Total** | ***p*** |
| --- | --- | --- | --- | --- |
| Sex |  |  |  |  |
| Male | 4 (40%) | 7 (36.8) | 11 (37.9) | 1 |
| Female | 6 (60%) | 12 (63.2) | 18 (62.1) |
| Pneumonia |  |  |  |  |
| Present | 4 (44.4) | 7 (36.8) | 11 (39.3) | 1 |
| Absent | 5 (55.6) | 12 (63.2) | 17 (60.7) |
| Acute respiratory failure |  |  |  |  |
| Present | 5 (50) | 5 (26.3) | 10 (34.5) | 0.244 |
| Absent | 5 (50) | 14 (73.7) | 19 (65.5) |
| Regurgitation |  |  |  |  |
| Present | 5 (50) | 7 (36.8) | 12 (41.4) | 0.694 |
| Absent | 5 (50) | 12 (63.2) | 17 (58.6) |
| Vomiting |  |  |  |  |
| Present | 4 (40%) | 10 (52.6) | 14 (48.3) | 0.700 |
| Absent | 6 (60%) | 9 (47.4) | 15 (51.7) |
| Abdominal pain |  |  |  |  |
| Present | 5 (55.6) | 9 (47.4) | 14 (50) | 1 |
| Absent | 4 (44.4) | 10 (52.6) | 14 (50) |
| Steatorrhea |  |  |  |  |
| Present | 4 (40%) | 7 (36.8) | 11 (37.9) | 1 |
| Absent | 6 (60%) | 12 (63.2) | 18 (62.1) |
| Pancreatic insufficiency |  |  |  |  |
| Present | 10 (100) | 18 (94.7) | 28 (96.6) | 1 |
| Absent | 0 | 1 (5.3) | 1 (3.4) |
| *Staphylococcus aureus* |  |  |  |  |
| Present | 10 (100) | 18 (94.7) | 28 (96.6) | 1 |
| Absent | 0 | 1 (5.3) | 1 (3.4) |
| *Pseudomonas aeruginosa* no mucoid |  |  |  |  |
| Present | 10 (100) | 15 (78.9) | 25 (86.2) | 0.268 |
| Absent | 0 | 4 (21.1) | 4 (13.8) |
| Mucoid *P. aeruginosa* |  |  |  |  |
| Present | 1 (10) | 5 (26.3) | 6 (20.7) | 0.633 |
| Absent | 9 (90) | 14 (73.7) | 23 (79.3) |
| *Stenotrophomonas maltophilia* |  |  |  |  |
| Present | 5 (50) | 8 (42.1) | 13 (44.8) | 0.714 |
| Absent | 5 (50) | 11 (57.9) | 16 (55.2) |
| *Burkholderia cepacia* |  |  |  |  |
| Present | 1 (10) | 6 (31.6) | 7 (24.1) | 0.206 |
| Absent | 9 (10) | 13 (68.4) | 22 (75.9) |

GER, gastroesophageal reflux; GERD, gastroesophageal reflux disease.

We presented the data in absolute frequency and relative frequency.

We performed the statistical analysis using the Chi-square or Fisher's exact tests.

We adopted an alpha error of 0.05.

**Appendix 5 - Association of multi-channel intraluminal impedance associated with pHmetry (MIIpH) with clinical and laboratory markers, including diagnosis-associated features, in patients with cystic fibrosis.**

| **Diagnostic marker** | **GERD** | **Physiological GER** | **p** |
| --- | --- | --- | --- |
| 1st IRT | 173.90 ± 52.26; 185.55 (127.40 to 199.25) | 162.56 ± 88.37; 148.40 (100 to 216) | 0.420 |
| 2nd IRT | 133.51 ± 26.73; 137 (107.50 to 141.05) | 198.18 ± 154.33 (154 (96.23 to 255.40) | 0.202 |
| Sodium: 1st ST (mEq/L) | 70.01 ± 18.02; 67.85 (56.76 to 79.68) | 68.96 ± 24.30; 74.18 (58.70 to 81.15) | 0.695 |
| Chloride: 1st ST (mEq/L) | 121.45 ± 54.25; 119.03 (94.30 to 128.62) | 103.97 ± 21.76; 110.40 (93 to 115.01) | 0.450 |
| Sodium: 2nd ST (mEq/L) | 73.97 ± 28.62; 69.63 (53.18 to 90) | 80.01 ± 27.71; 76.69 (67.24 to 85) | 1 |
| Chloride: 2nd ST (mEq/L) | 116.23 ± 29.36; 118.60 (97.16 to 132.36) | 113.24 ± 22.99; 111.21 (102.05 to 121.95) | 0.695 |
| **Clinical and laboratory markers** | | | |
| Bhalla score | 10.43 ± 4.89; 8 (7 to 15) | 13.11 ± 7.47; 9 (6.5 to 20.50) | 1 |
| SpO2 | 97.90 ± 0.74; 98 (97 to 98.25) | 97.47 ± 1.17; 98 (96 to 98) | 1 |
| Exclusive breastfeeding (months) | 6.20 ± 10.72; 4 (0.38 to 6) | 7.45 ± 10.87; 5 (1 to 8) | 0.433 |
| Age until breastfeeding (months) | 17 ± 19.32; 8.50 (0 to 36) | 26.79 ± 29.01; 18 (8 to 35) | 0.700 |
| Body mass index (Kg/m2) | 16.06 ± 1.92; 15.95 (15 a 17.08) | 15.87 ± 2.88; 15.20 (14.30 to 16.80) | 0.450 |
| <–3 | 1/19 (5.26%) | 0 | 0.578 |
| ≥–3 to <–2 | 0 | 1/10 (10%) |  |
| ≥–2 <+1 | 13/19 (68.42%) | 7/10 (70%) |  |
| ≥+1 to <+2 | 3/19 (15.79%) | 1/10 (10%) |  |
| ≥+2 to ≤+3 | 0 | 1/10 (10%) |  |
| >+3 | 1/19 (5.26%) | 0 |  |
| Number of exacerbations | 3.90 ± 2.96; 3.50 (1 to 7.25) | 2.89 ± 2.54; 2 (1 to 4) | 0.450 |

GER, gastroesophageal reflux; GERD, gastroesophageal reflux disease; IRT, Immunoreactive trypsinogen; SpO2, Peripheral oxygen saturation; ST, sweat test.

Data are presented in absolute frequency and relative frequency or mean ± standard deviation; median (25th to 75th percentile).

We performed the statistical analysis using the Mann-Whitney test and Fisher Exact test.

We adopted an alpha error of 0.05.
